# Supplementary material for: The genetics of a putative social trait in natural populations of yeast
Source: Mol Ecol. 2014 Oct 4;23(20):5061–71. doi: 10.1111/mec.12904 (PMC4285311; doi:10.1111/mec.12904)
Supplement: Fig S1 — Southern blot confirmation of SUC2 knockouts in the multiple-copied strains, and common laboratory strain C.Lab.1 (S288c). [file mec0023-5061-SD7.pdf]

*SUC1* (Chromosome VII)

*SUC3* (Chromosome II)  
*SUC9* (Chromosome XIV)  
*SUC8* (Chromosome X)

*SUC2* (Chromosome IX)

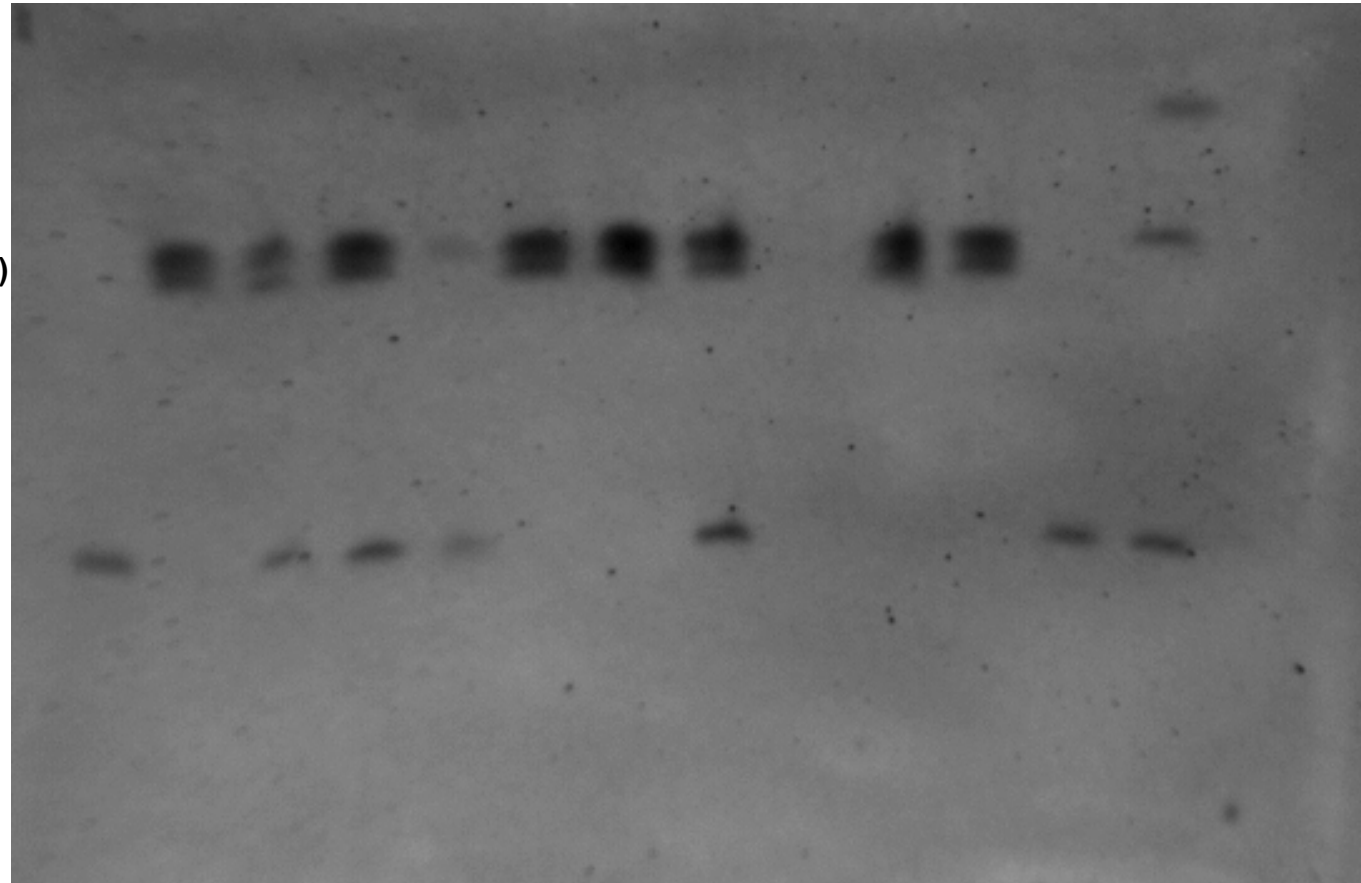

1. C.Nectar.Malaysia1.*suc2::NATMX*

2. C.Nectar.Malaysia.1

3. C.Nectar.Malaysia.2

4. C.Ginger.Wine

5. C.Ginger.Wine.*suc2::NATMX*

6. C.Nectar.Malaysia2.*suc2::NATMX*

7. C.Nectar.Malaysia.3

8. C.Lab.1.*suc2::KANMX*

9. C.Billi.Wine.*suc2::NATMX*

10. C.Nectar.Malaysia3.*suc2::NATMX*

11. C.Lab.1

12. C.Billi.Wine
