# Supplementary material for: The genetics of a putative social trait in natural populations of yeast
Source: PubMed Central journal article supplement (PMC4285311; doi:10.1111/mec.12904), 2014-10-04

*SUC3* (Chromosome II)  
*SUC9* (Chromosome XIV)  
*SUC8* (Chromosome X)

*SUC2* (Chromosome IX)

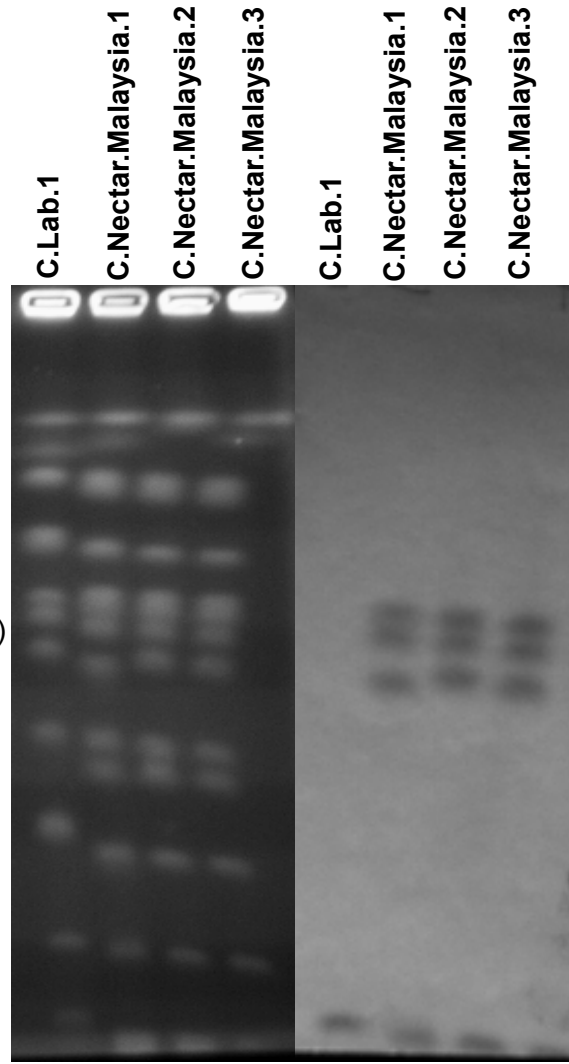

Supplement: mec0023-5061-SD9.pdf [file mec0023-5061-SD9.pdf]
